# Supplementary material for: Toward a High Spatial Resolution Aerial Monitoring Network for Nature Conservation—How Can Remote Sensing Help Protect Natural Areas?
Source: MDPI journal article supplement (doi:10.3390/su13168807), 2021-08-06
Supplement: s1 [file s1]

Archive with 3 entries (3 files):
- File S1.pdf
- File S2.pdf
- File S3.pdf
