# Supplementary material for: Toward a High Spatial Resolution Aerial Monitoring Network for Nature Conservation—How Can Remote Sensing Help Protect Natural Areas?
Source: MDPI journal article supplement (doi:10.3390/su13168807), 2021-08-06
Supplement: s1 [file s1]

Supplementary Material  
**Appendix 1. Experimental sample areas**

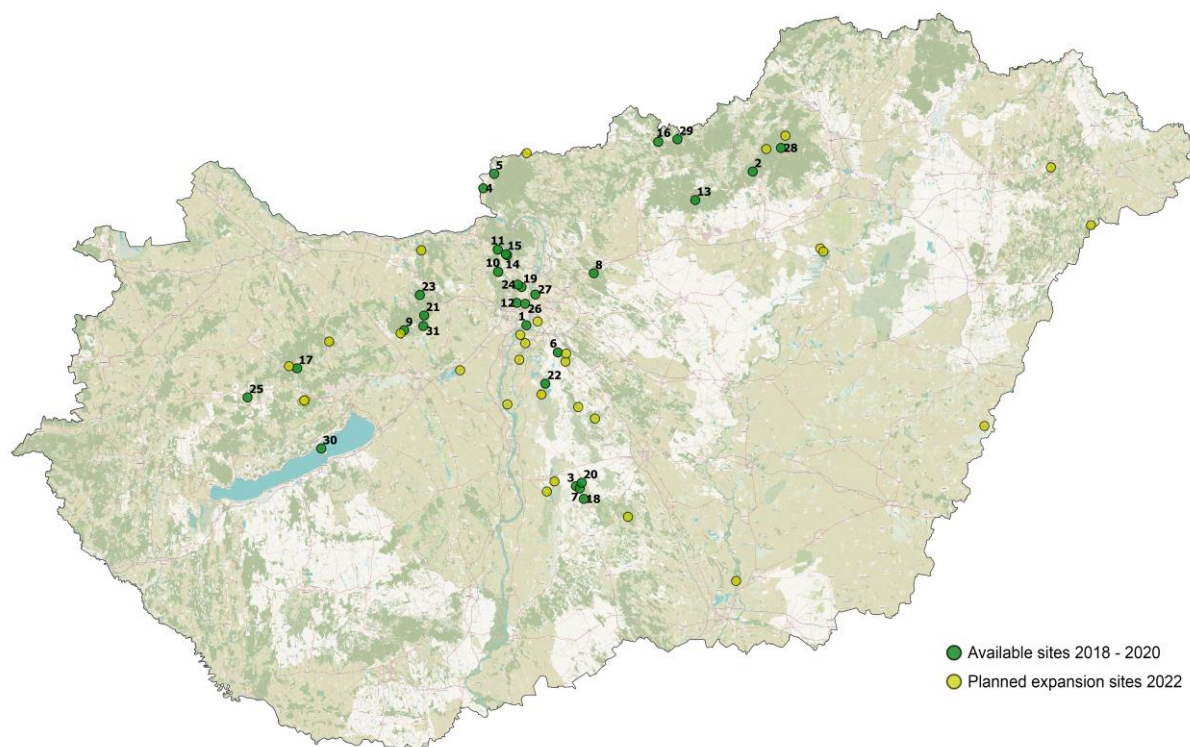

| Sample area                                               | Importance for HRAMN         | Area (km <sup>2</sup> ) | Start of survey |
|-----------------------------------------------------------|------------------------------|-------------------------|-----------------|
| 1. Háros peninsula                                        | Forest reserve               | 1.65                    | 2016            |
| 2. Szarvaskő                                              | Rocky grasslands             | 7.02                    | 2018            |
| 3. Soltszentimre juniper site                             | Grasslands                   | 0.41                    | 2018            |
| 4. Cserge brook                                           | Beaver impact study area     | 0.19                    | 2018            |
| 5. Orzsán brook                                           | Beaver impact study area     | 0.27                    | 2018            |
| 6. Ócsa wetlands                                          | Marshy wetland               | 4.62                    | 2018            |
| 7. Lake Kolon forest restoration experiment site          | Forest restoration area      | 0.82                    | 2018            |
| 8. Nagy-Istrázsa-hegy Strict Forest Reserve               | Forest reserve               | 2.17                    | 2018            |
| 9. Juhdöglő-völgy Strict Forest Reserve                   | Forest reserve               | 1.40                    | 2018            |
| 10. Kíszénás                                              | Rocky grasslands             | 3.89                    | 2018            |
| 11. Pilistető                                             | Forestry sample area         | 5.83                    | 2018            |
| 12. Csillebérc                                            | Incorporation of forest area | 1.08                    | 2018            |
| 13. Kékes-Észak Strict Forest Reserve                     | Forest reserve               | 1.96                    | 2018            |
| 14. Pilis Gap Experimental area                           | Forestry sample area         | 0.24                    | 2019            |
| 15. Pilis Forestry Systems and Pilis Gap Experiments site | Forestry sample area         | 1.33                    | 2019            |

|                                      |                                                          |      |      |
|--------------------------------------|----------------------------------------------------------|------|------|
| 16. Baglyaskővár                     | Deterioration of historical site                         | 0.05 | 2019 |
| 17. Bakonybél                        | Forestry sample area                                     | 1.15 | 2019 |
| 18. Közös-erdő Strict Forest Reserve | Forest reserve                                           | 1.08 | 2018 |
| 19. Hármashatár-hegy                 | Degraded forest areas                                    | 7.35 | 2019 |
| 20. Lake Kolon                       | Heron breeding colonies as an ecosystem indicator        | 0.14 | 2018 |
| 21. Pamlag Valley (Vértes Hills)     | Forest reserve and rocky grassland                       | 2.40 | 2018 |
| 22. Apaj                             | Rocky grasslands                                         | 7.58 | 2018 |
| 23. Vitányvár Valley                 | Forestry sample area                                     | 0.13 | 2018 |
| 24. Vöröskővár Hill                  | Caspian whipsnake ( <i>Dolichophis caspius</i> ) habitat | 0.22 | 2019 |
| 25. Devecser                         | Environmental restoration sample area                    | 0.73 | 2010 |
| 26. Sas Hill Nature Reserve          | Rocky grasslands                                         | 0.59 | 2019 |
| 27. Budapest Zoo                     | Ex-situ wildlife protecting sample area                  | 0.59 | 2009 |
| 28. Bükk Mountains, Nagymező         | Rocky grasslands                                         | 1.72 | 2010 |
| 29. Szilvás-kő (Karancs-Medves)      | Rocky grasslands                                         | 0.43 | 2021 |
| 30. Tihany, Külső-tó                 | Wetland                                                  | 1.07 | 1980 |
| 31. Haraszt Hill (Vértes Hills)      | Forest reserve                                           | 2.13 | 2010 |
| 32. Böddi-szék                       | Saline aquatic habitat                                   | 3.5  | 2020 |

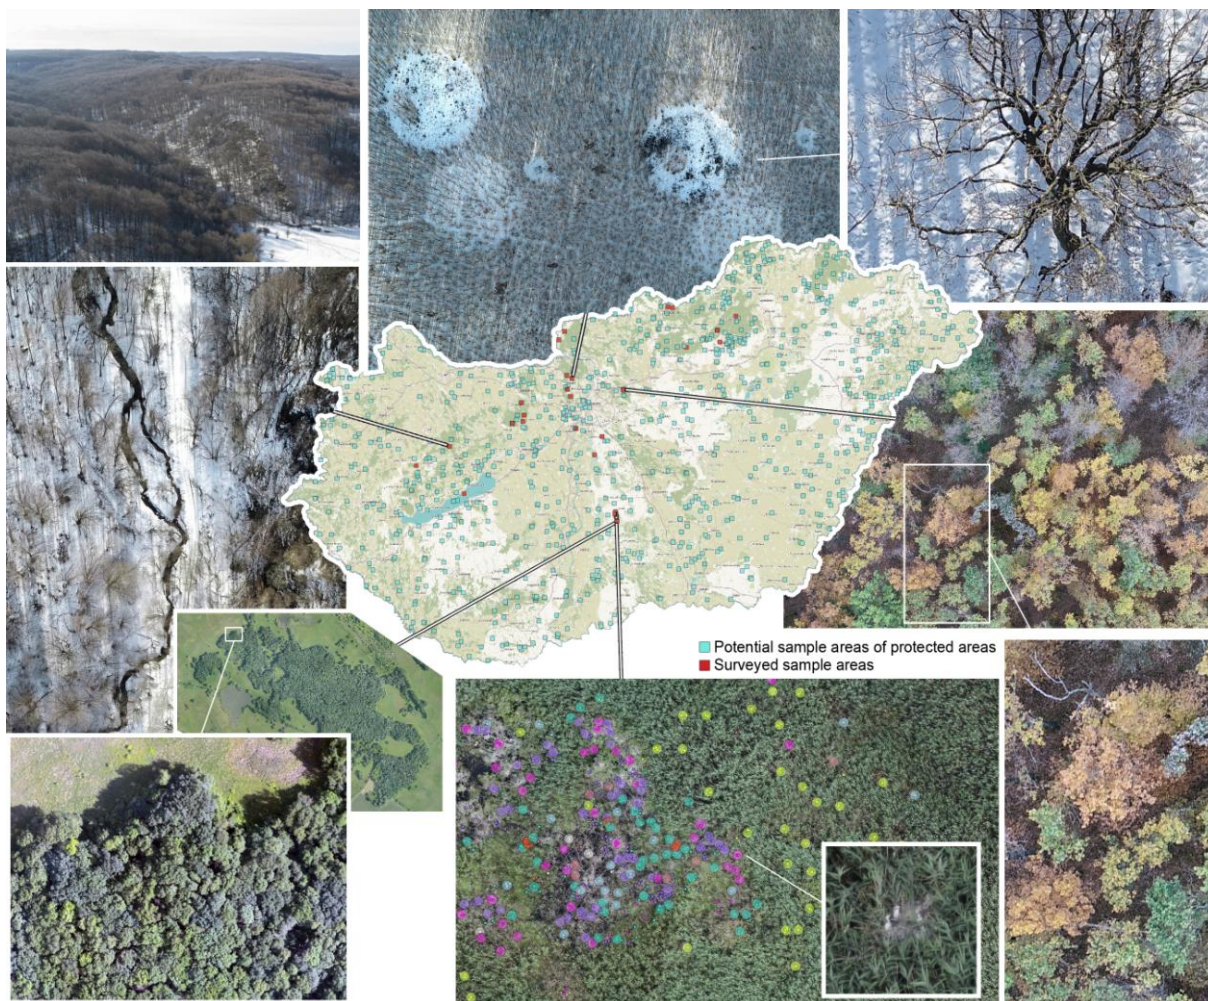

Figure 2 of Supplementary 1. Overview map of existing and potential sampling areas. The network of Natura 2000 sites (Special Area of Conservation) could benefit from HRAMN sample areas and monitoring services.
